# Supplementary material for: Efficient synthesis of butyl levulinate from furfuryl alcohol over ordered mesoporous Ti-KIT-6 catalysts for green chemistry applications
Source: Royal Society of Chemistry journal article supplement (doi:10.1039/c7ra10289e), 2017-01-01
Supplement: c7ra10289e1.pdf [file c7ra10289e1.pdf]

## Efficient synthesis of butyl levulinate from furfuryl alcohol over ordered mesoporous Ti-KIT-6 catalysts for green chemistry application

Jimmy Nelson Appaturi<sup>a,1</sup> Mohd. Rafie Johan<sup>a</sup>, R. Jothi Ramalingam<sup>b</sup>

, Hamad A. Al-Lohedan<sup>b</sup>, J. Judith Vijaya<sup>c,\*</sup>

<sup>a</sup>*Nanotechnology & Catalysis Research Centre (NANOCAT) University of Malaya, 50603 Kuala Lumpur, Malaysia.*

<sup>b</sup>*Chemistry Department, College of Science, King Saud University, Riyadh 11451, Saudi Arabia.*

<sup>c</sup>*Catalysis & Nanomaterials Research Laboratory, Department of Chemistry, Loyola College, Chennai 600 034, India*

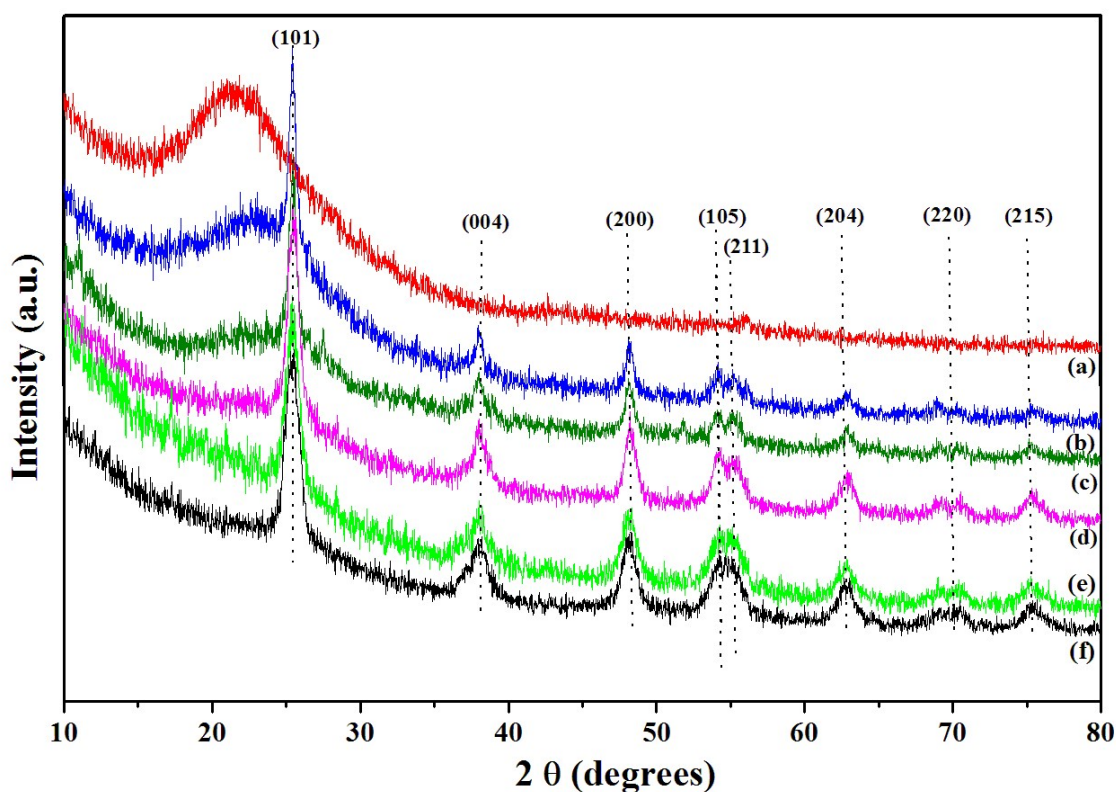

**Fig. S1.** High angle powder XRD patterns of calcined (a) KIT-6 and Ti-KIT-6 with Si/Ti ratios: (b) 10, (c) 20, (d) 40, (e) 80 and (f) 100.

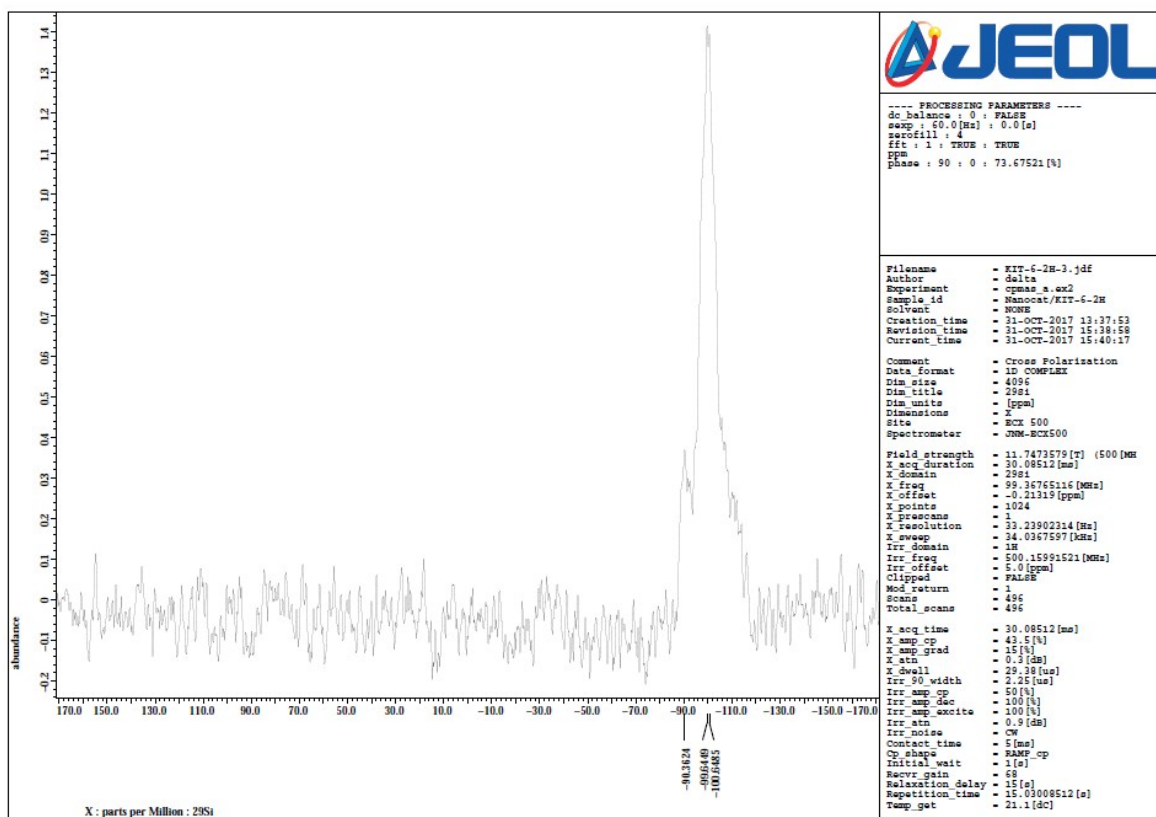

**Fig. S2.** The  $^{29}\text{Si}$  MAS-NMR spectra for KIT-6.

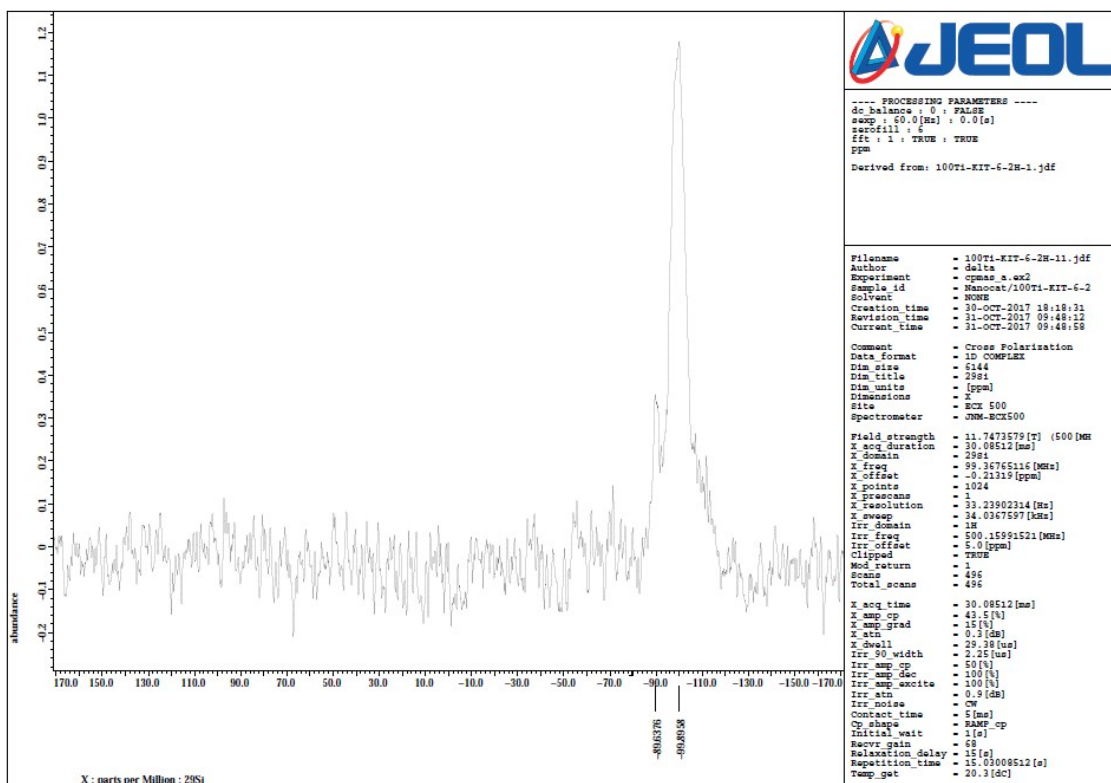

Fig. S3. The  $^{29}\text{Si}$  MAS-NMR spectra for 100Ti-KIT-6.
